# Supplementary material for: Positive charge of “sticky” peptides and proteins impedes release from negatively charged PLGA matrices
Source: Royal Society of Chemistry journal article supplement (doi:10.1039/c5tb00515a), 2015-01-01
Supplement: c5tb00515a1.pdf [file c5tb00515a1.pdf]

**Positive Charge of “Sticky” Peptides and Proteins Impedes Release from Negatively Charged PLGA Matrices**

Stephen C. Balmert, Andrew C. Zmolek, Andrew J. Glowacki, Timothy D. Knab, Sam N. Rothstein, Joseph M. Wokpetah, Morgan V. Fedorchak, Steven R. Little

**SUPPLEMENTAL FIGURES & TABLES**

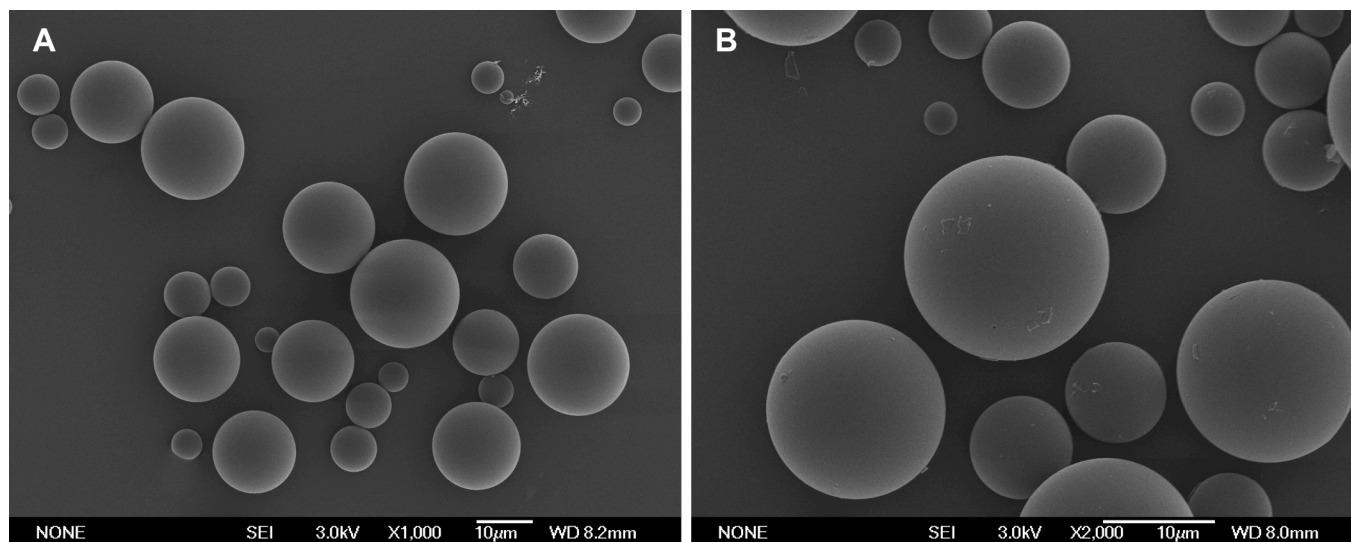

**Fig S1: Scanning electron micrographs (SEM) of microparticles.** Representative images show spherical particles with nonporous surface morphology, characteristic of all microparticle formulations used. (A) 43 kDa PLGA containing +1.5/kDa peptide at 1000x magnification. (B) 15 kDa PLGA containing +2.7/kDa peptide at 2000x magnification.

| PLGA Polymer | Positively Charged Peptides |           |           |           |           | Charge Changing Peptides |          |
|--------------|-----------------------------|-----------|-----------|-----------|-----------|--------------------------|----------|
|              | 0                           | +0.5      | +1.4      | +2.7      | +3.1      | CK1sub                   | BA17     |
| 7 kDa        | 20.3±9.3                    | 21.7±12.0 | 19.5±12.2 | 21.3±11.9 | 20.9±9.1  | 23.5±9.9                 | ---      |
| 15 kDa       | 20.3±8.1                    | 19.6±8.6  | 17.3±6.8  | 17.4±7.8  | 22.9±13.6 | 23.2±9.3                 | 11.3±3.5 |
| 43 kDa       | 23.2±9.3                    | 17.4±7.9  | 16.8±6.5  | 21.7±8.9  | 25.8±14.2 | 18.9±8.9                 | ---      |
| 15 kDa-E     | 20.7±10.9                   | 19.1±8.9  | 17.4±7.3  | 14.8±5.1  | 19.8±9.6  | 15.7±8.2                 | 14.9±5.6 |

**Table S1: Volume averaged size distributions for microparticle formulations.** Data represent Mean ± SD of particle diameters (µm) for 50,000 particle measurements by Multisizer 3 Coulter Counter.

| PLGA Polymer | Positively Charged Peptides |        |        |        |         | Charge Changing Peptides |        |
|--------------|-----------------------------|--------|--------|--------|---------|--------------------------|--------|
|              | 0                           | +0.5   | +1.4   | +2.7   | +3.1    | CK1sub                   | BA17   |
| 7 kDa        | 602±25                      | 535±24 | 575±27 | 430±30 | 562±167 | 417±9                    | ---    |
| 15 kDa       | 597±37                      | 613±33 | 572±37 | 590±38 | 536±58  | 467±19                   | 440±13 |
| 43 kDa       | 603±13                      | 513±22 | 497±25 | 524±11 | 472±32  | 342±5                    | ---    |
| 15 kDa-E     | 434±42                      | 442±29 | 325±7  | 504±46 | 537±29  | 458±22                   | 362±20 |

**Table S2: Total peptide loading.** Total mass of peptides encapsulated in 1 mg of MPs, as detected by fluorescence spectroscopy. Values correspond to 100% cumulative release. Data represent Mean ± SD (ng/mgMP) from 3 microparticle samples.

| PLGA Polymer | Positively Charged Peptides |      |      |      |       | Charge Changing Peptides |      |
|--------------|-----------------------------|------|------|------|-------|--------------------------|------|
|              | 0                           | +0.5 | +1.4 | +2.7 | +3.1  | CK1sub                   | BA17 |
| 7 kDa        | 96±4                        | 86±4 | 92±4 | 69±5 | 90±27 | 67±1                     | ---  |
| 15 kDa       | 95±6                        | 98±5 | 91±6 | 94±6 | 86±9  | 75±3                     | 70±2 |
| 43 kDa       | 97±2                        | 82±4 | 80±4 | 84±2 | 76±10 | 55±1                     | ---  |
| 15 kDa-E     | 69±7                        | 71±5 | 52±1 | 81±7 | 86±5  | 73±4                     | 58±3 |

**Table S3: Encapsulation efficiency.** Percent encapsulation based on total loading from Table S1 and theoretical loading of 625ng/mgMP. Data represent Mean ± SD from 3 microparticle samples.

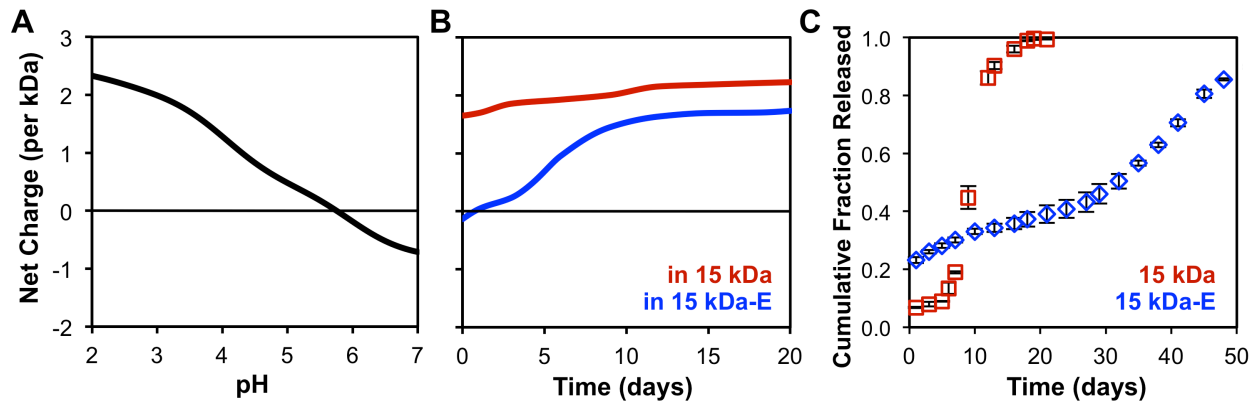

**Fig S2: Initial burst of BA17 peptide is influenced by its initial charge, which depends on the initial pH of the microenvironment in hydrated MPs.** (A) Net charge, normalized to peptide mass, as a function of pH for BA17 peptide, which has a low isoelectric point ( $pI < 6$ ) and pH-dependent charge. (B) Temporally dynamic net charge estimates for BA17 peptide encapsulated in uncapped 15 kDa (red) or ester-capped 15 kDa (blue) PLGA MPs. Charge predictions are based on intraparticle pH measurements (Fig 4A) and pH-dependent peptide charge (Fig S2A). (C) Cumulative release profiles for BA17 peptide encapsulated in uncapped 15 kDa (red squares) or ester-capped 15 kDa (blue diamonds) PLGA MPs. Note the greater initial burst from ester-capped 15 kDa PLGA MPs.
